# Supplementary material
Source: publisher figshare collection journal article supplement (https://frontiersin.figshare.com/ndownloader/files/22672013)
Supplement: Supplementary file 1 [file 22672013]

Supplementary Material

Litter windrows in the south-east coast of the Bay of Biscay: an ocean process enabling effective active fishing for litter

Irene Ruiz1*, Oihane C. Basurko1, Anna Rubio1, Matthias Delpey2, Igor Granado1, Amandine Declerck2, Julien Mader1, Andrés Cózar3

1AZTI, Marine Research, Basque Research and Technology Alliance (BRTA), Pasaia, Spain

2Rivages Pro Tech, SUEZ Eau France, Bidart, France

3Departamento de Biología, Campus de Excelencia Internacional del Mar, Instituto Universitario de Investigaciones Marinas, Universidad de Cádiz, Puerto Real E-11510, Spain

*** Correspondence:**Irene Ruiz
[iruiz@azti.es](mailto:iruiz@azti.es)

# Supplementary Figures S1-7

Trajectories of the tows (blue line) along the litter windrows during spring and summer 2018. The number at the top corresponds to the number of the tow. Positions are defined by their geographical coordinates.

# Supplementary Figures S8

Overview of the positions of the litter windrows during spring 2018 (dark pink line) and summer 2018 (yellow line). The number at the top corresponds to the number of the litter windrow.

# Supplementary Figures S9

Distance to coastline of each litter windrow during spring and summer 2018. The distance is established by reference to the center of gravity of the litter windrow.

# Supplementary Table S1

List of categories of litter items for marine litter characterization. This list is a shortened version of the *Master List* provided by the MSFD Technical Subgroup on Marine Litter adapted to the occurrence of litter items in study area.
